# Supplementary material
Source: PubMed Central journal article supplement (PMC7183029)

# ADH5

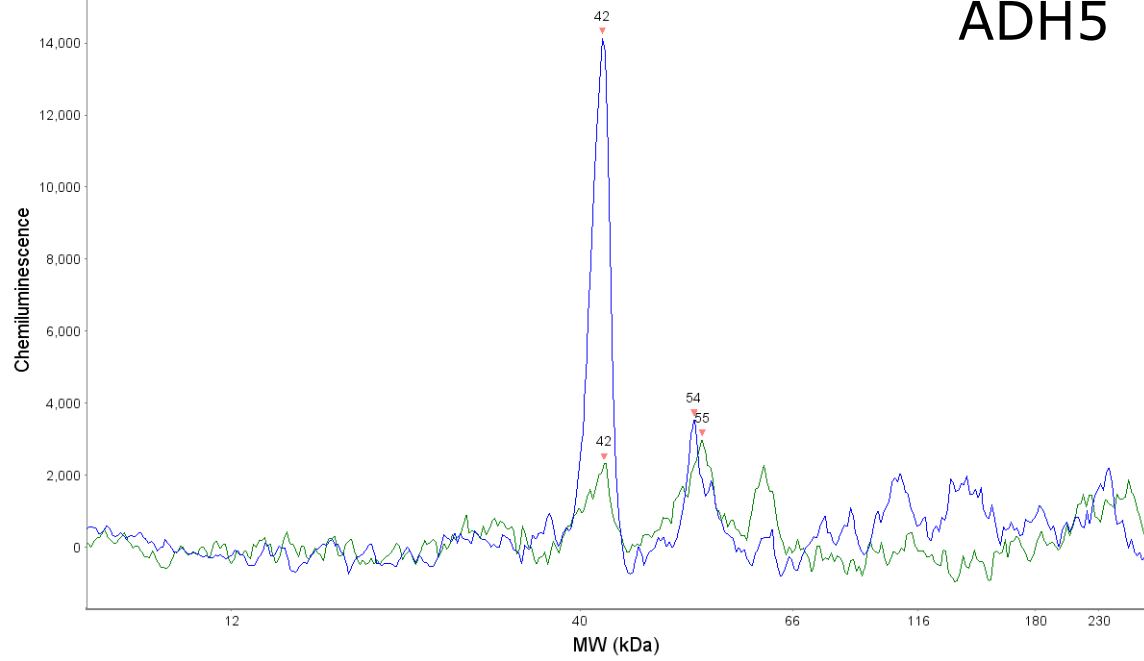

# GSS

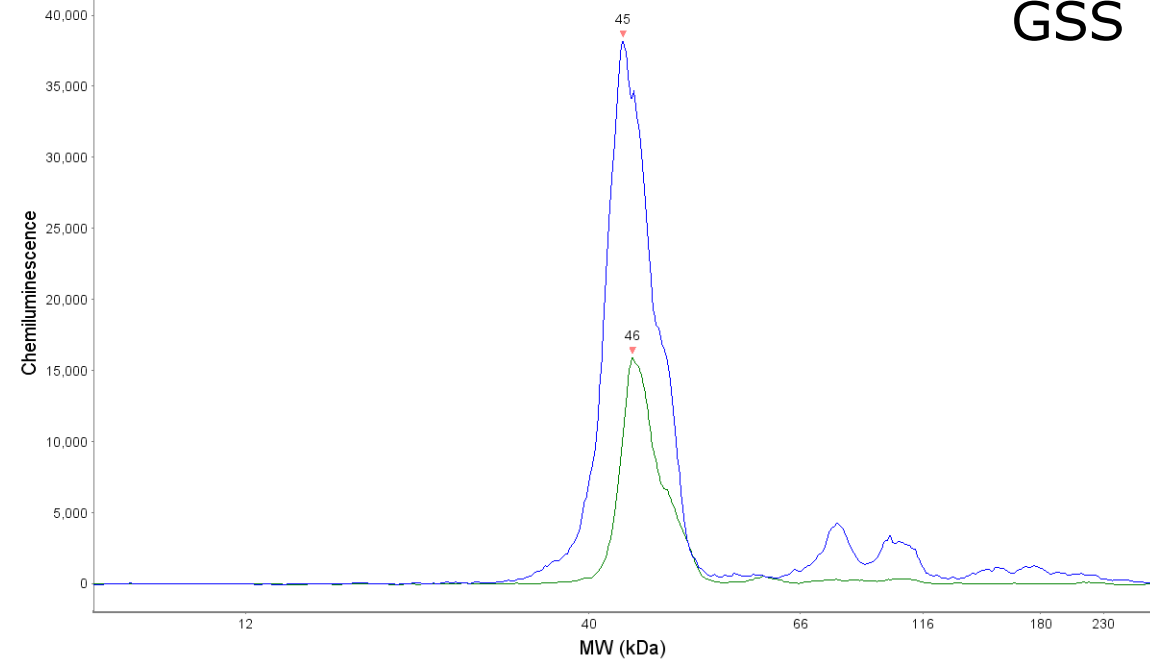

# LTA4H

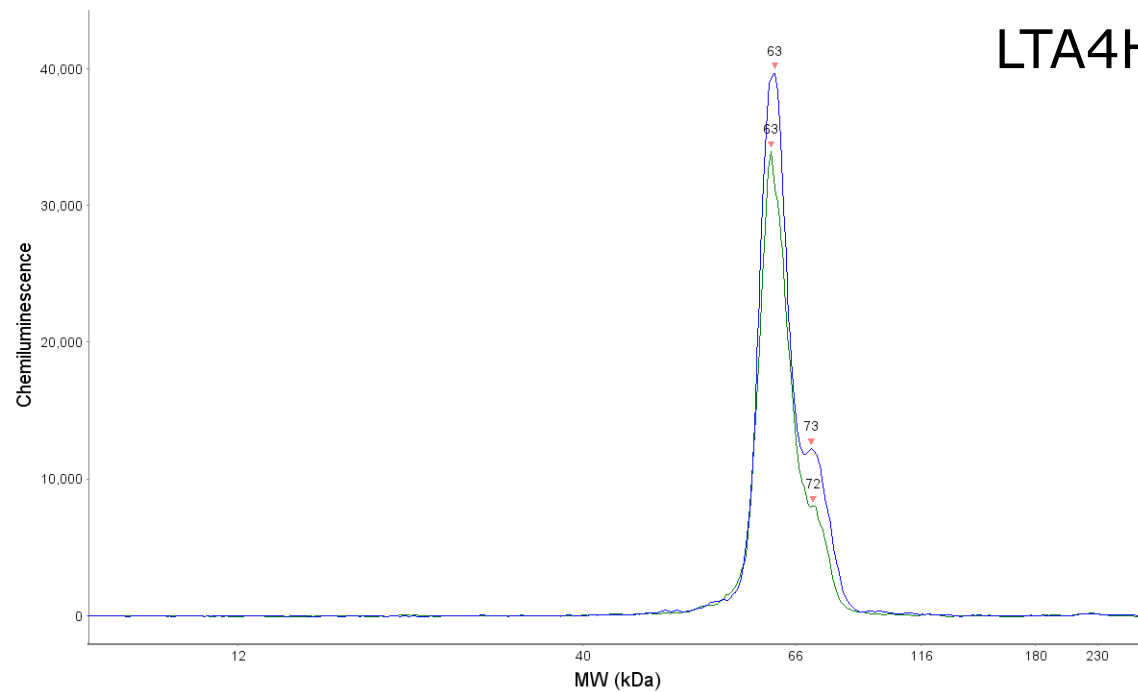

Supplement: 10815_2020_1707_MOESM1_ESM.pdf [file 10815_2020_1707_MOESM1_ESM.pdf]
